# Supplementary material for: Iron Content, Iron Speciation and Phycocyanin in Commercial Samples of Arthrospira spp
Source: MDPI journal article supplement (doi:10.3390/ijms232213949), 2022-11-12

**Supplementary Figure S1:** Chromatographic pattern of mycosporine-like aminoacids after size exclusion chromatography of extracts obtained from samples S1-S10.

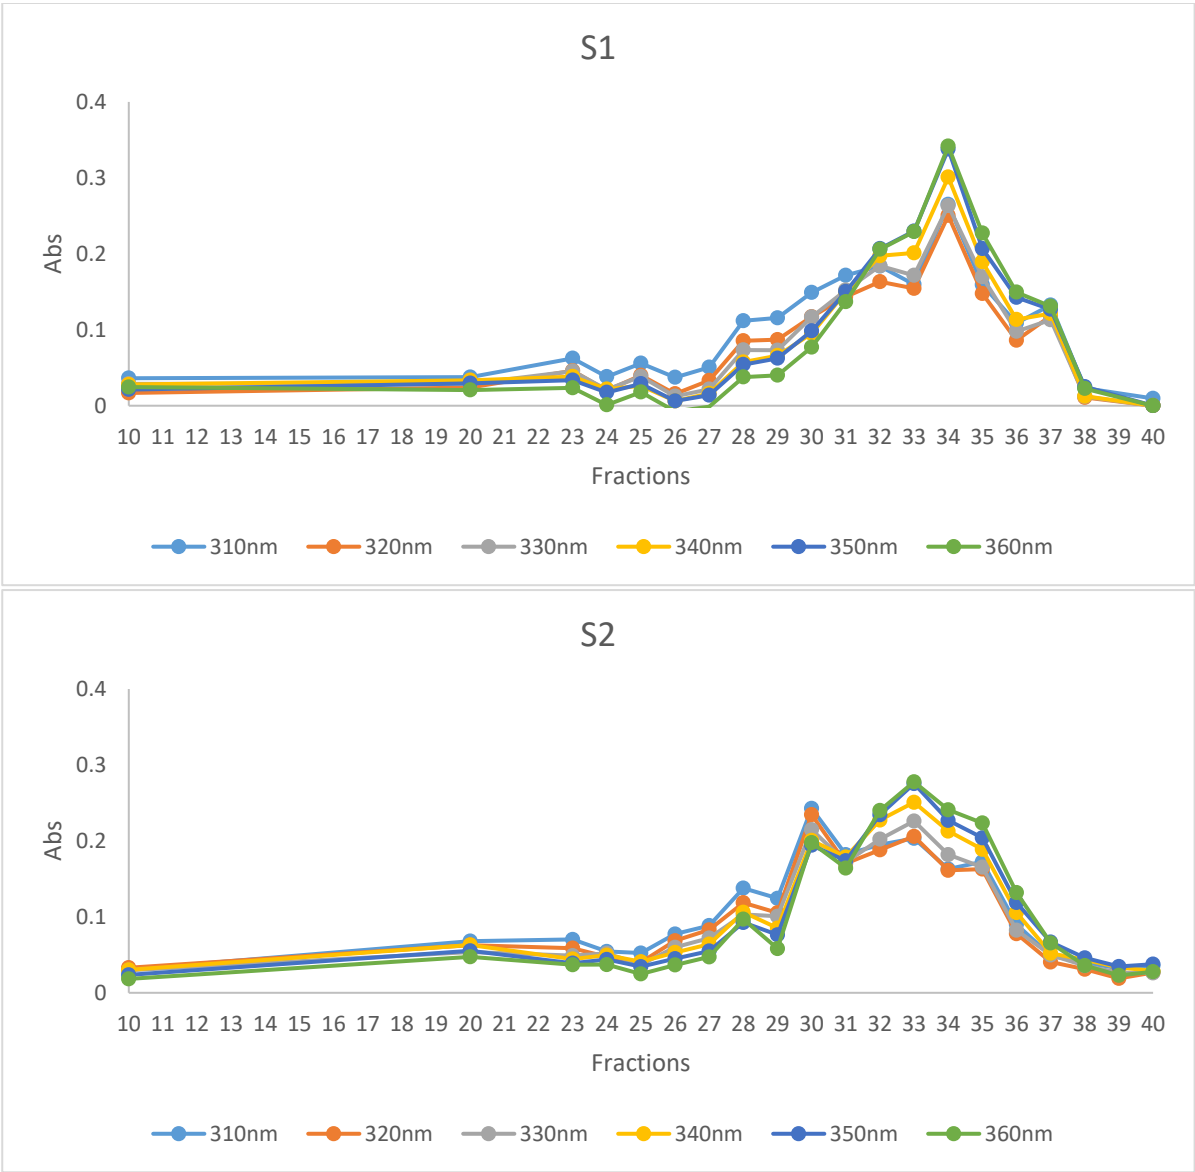

S3

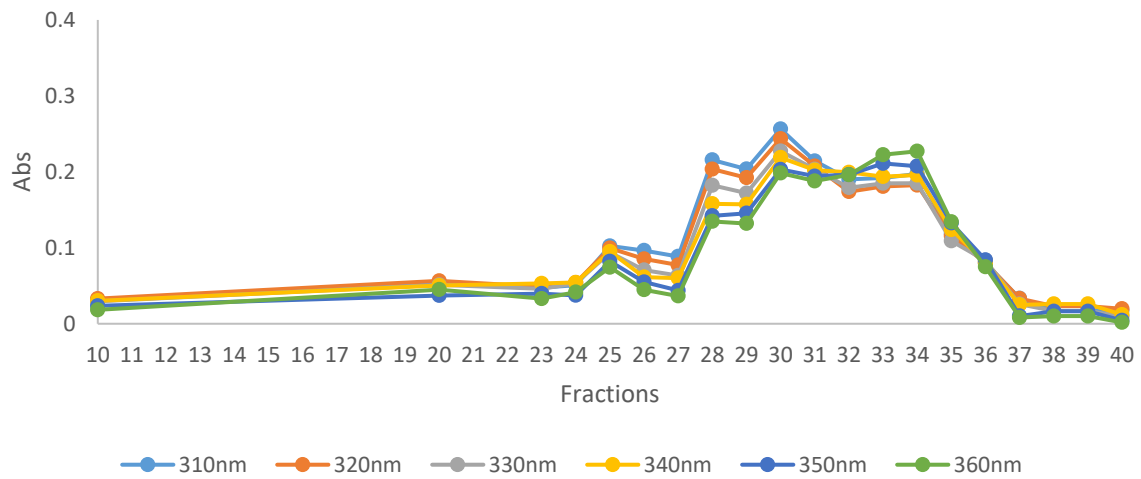

S4

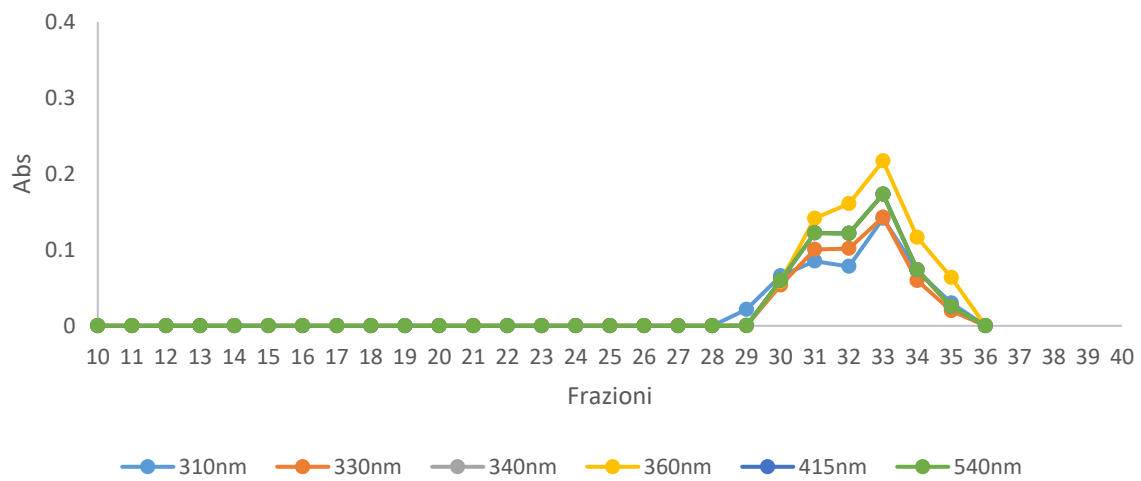

S5

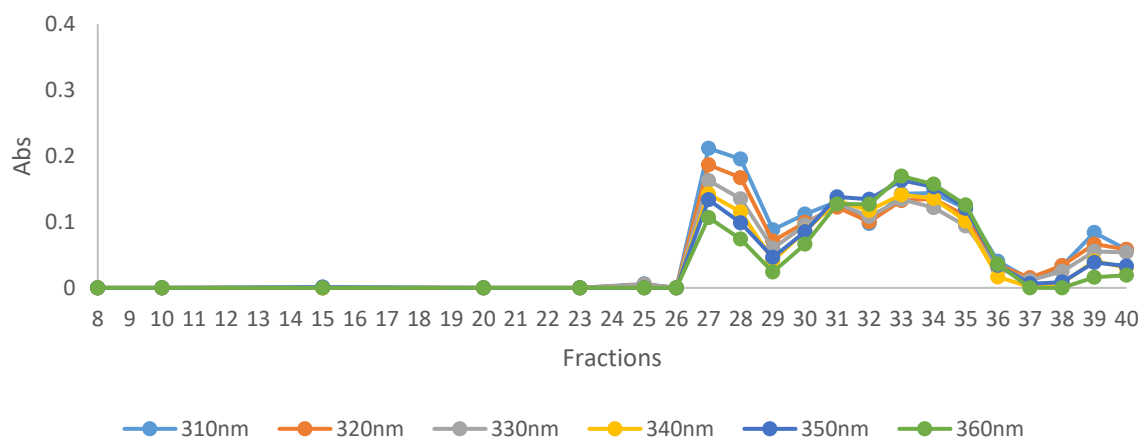

S6

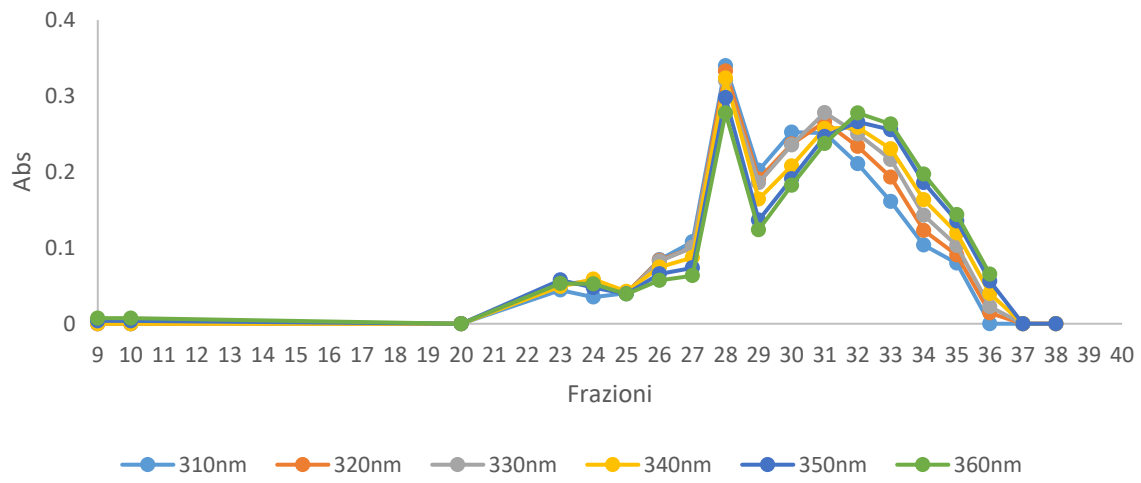

S7

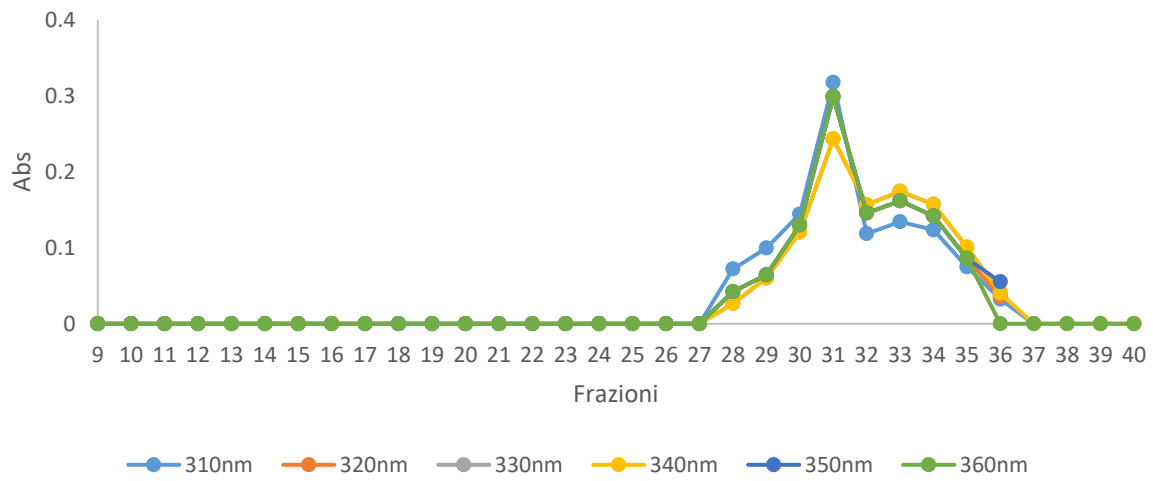

S8

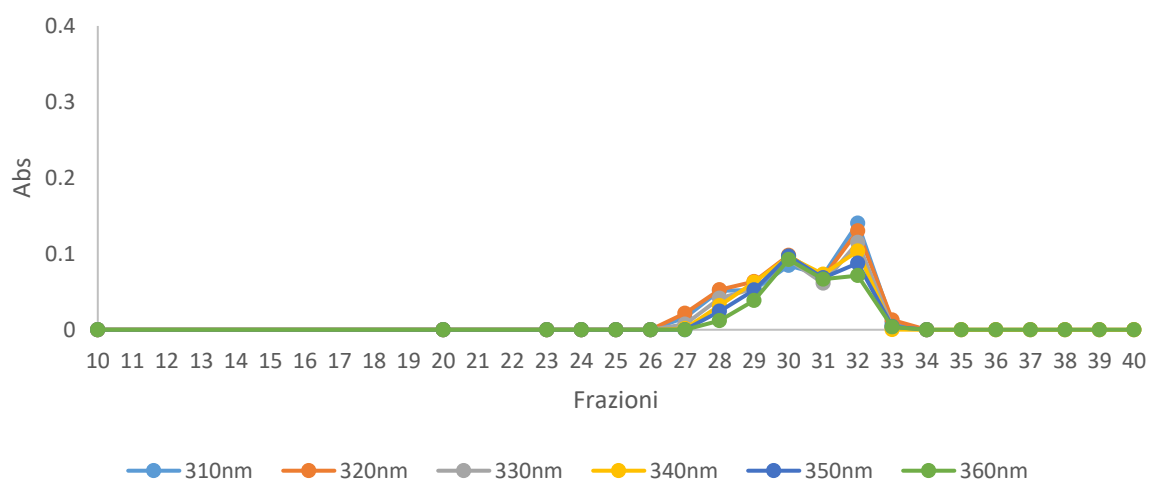

S9

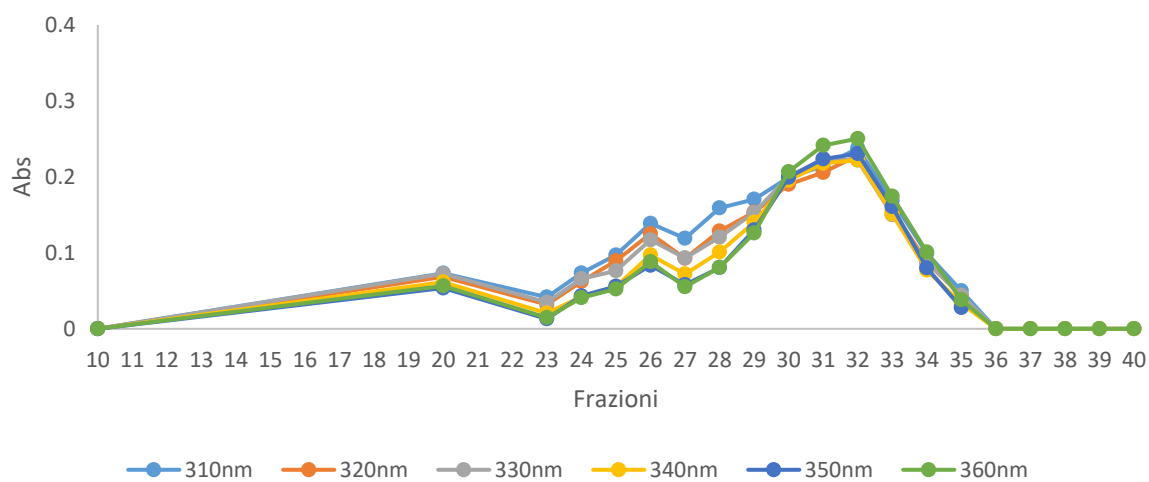

S10

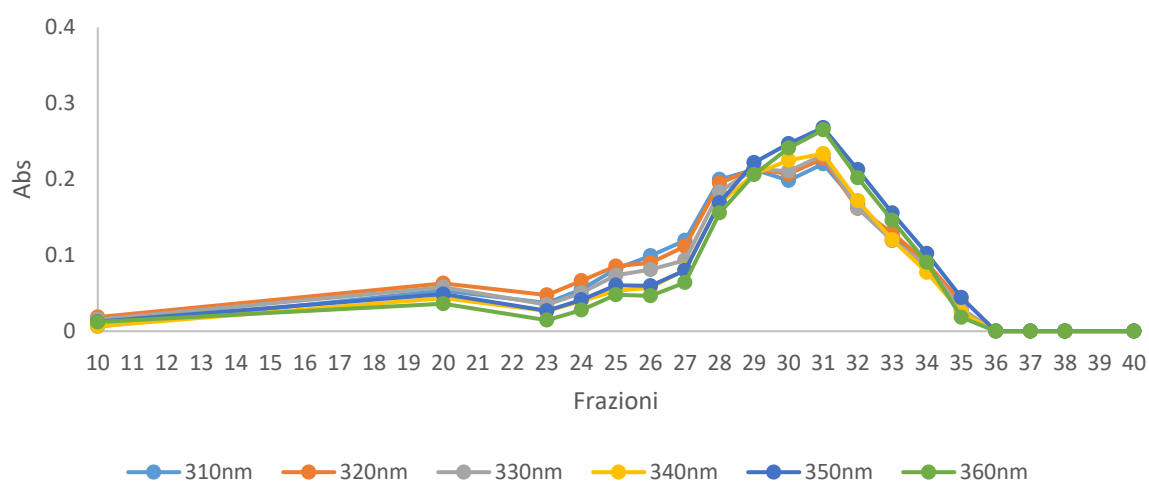

Supplement: s1 [file s1]
